# Supplementary material
Source: publisher figshare collection journal article supplement (https://aacr.figshare.com/articles/dataset/_/22367624)

# Supplemental Figure S5

## A

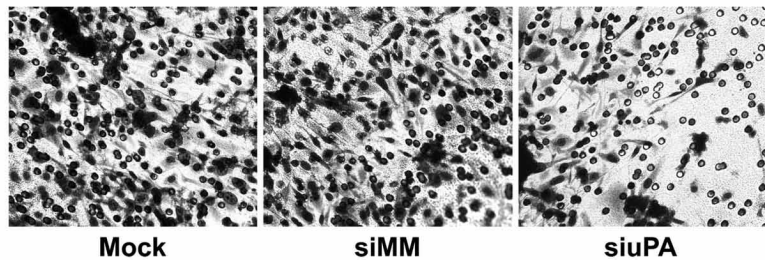

## B

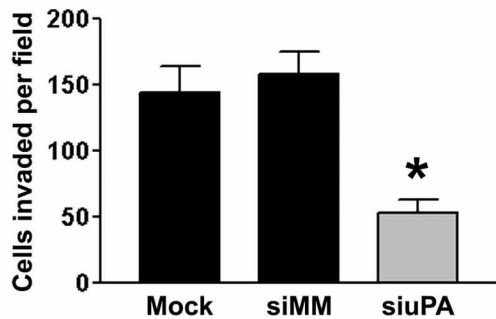

## C

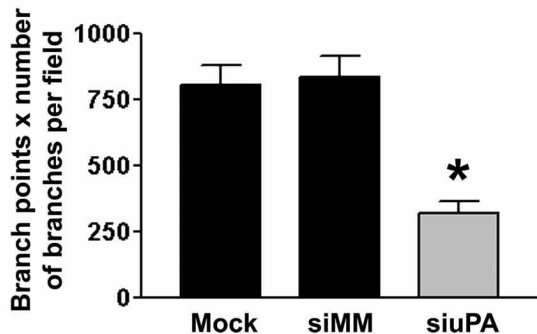

Supplement: Supplementary file 1 [file 39812696]
